# Supplementary material for: Species delimitation and phylogeny of a New Zealand plant species radiation
Source: PubMed Central journal article supplement (PMC2700801; doi:10.1186/1471-2148-9-111), 2009-05-20

Additional File 2.

Bayesian 50% majority rule tree of New Zealand species of *Ourisia*, rooted with one of the Tasmanian individuals of *O. integrifolia* and showing posterior probability (PP) values >50 for main clades. An asterisk (\*) means 100 PP. See Additional File 4 for name abbreviations and voucher information, and see Fig. 3 for the same tree, unrooted.

→ 1.0

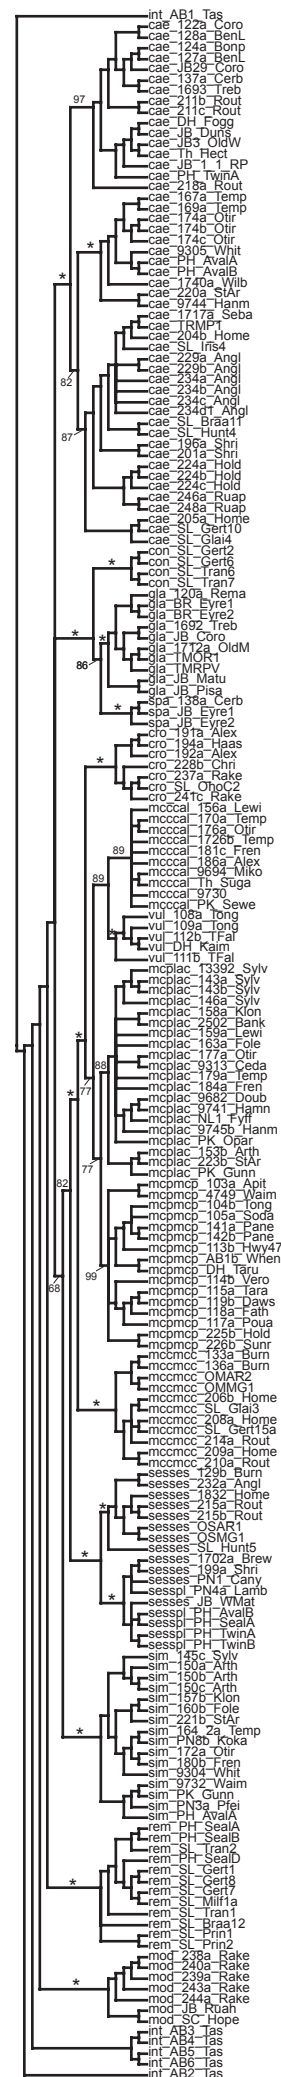

Supplement: 1471-2148-9-111-S2.pdf [file 1471-2148-9-111-S2.pdf]
